# Supplementary material
Source: PubMed Central journal article supplement (PMC3285070)

SUPPLEMENTAL FIGURE

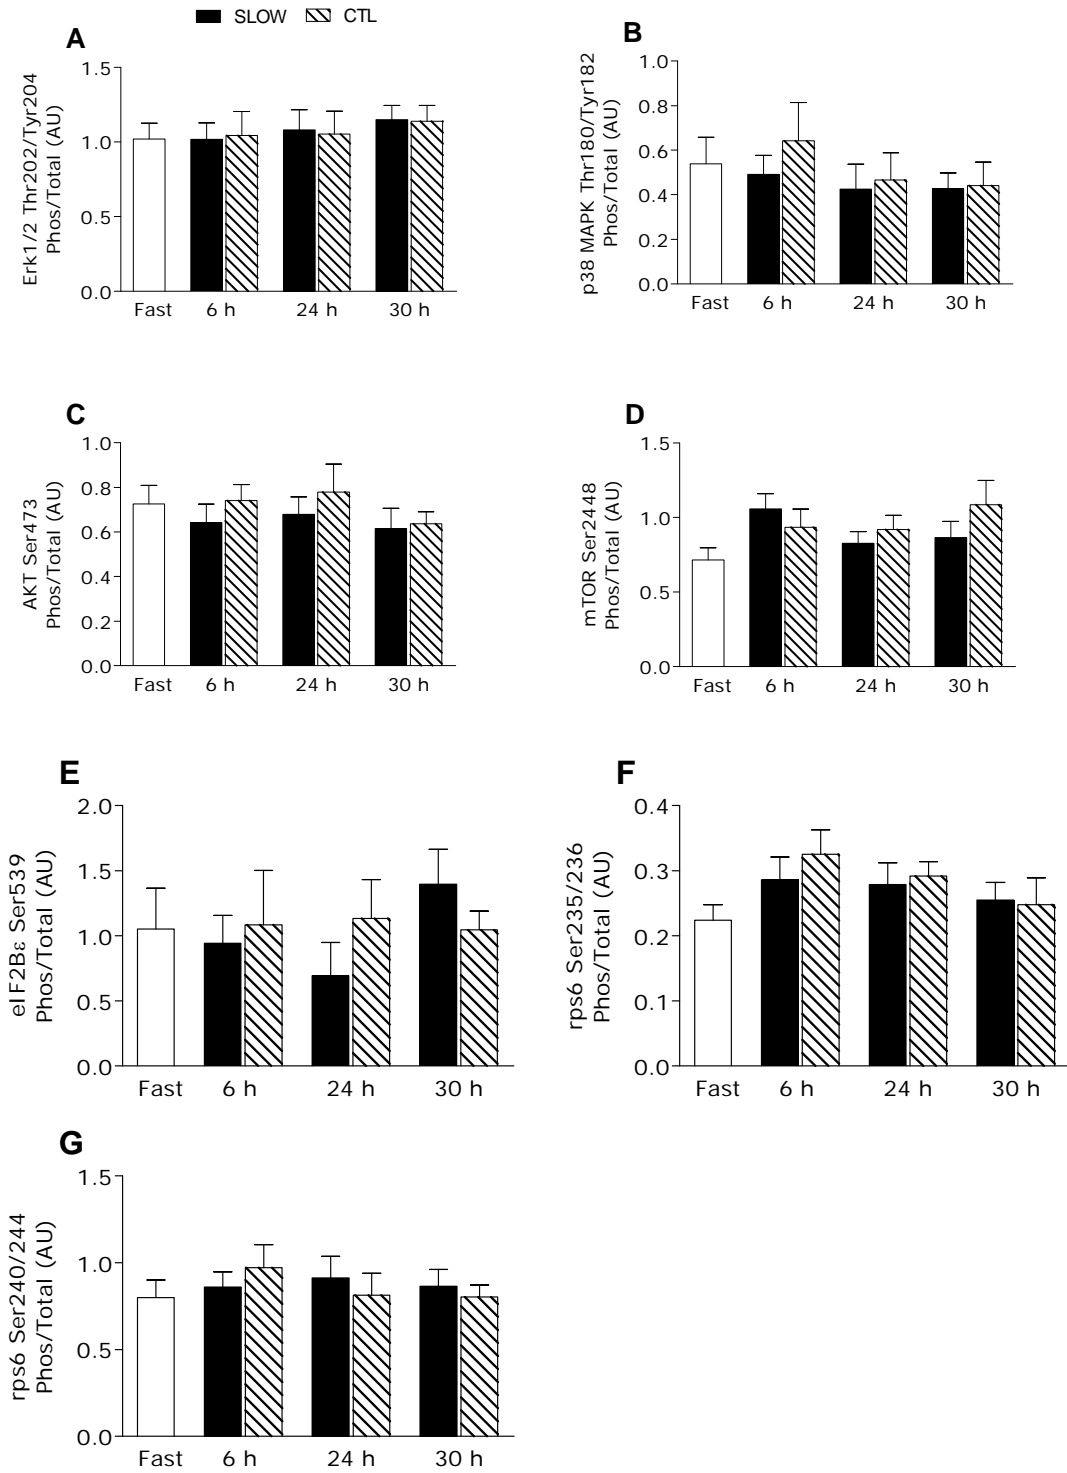

Supplement: tjp0590-0351-SD1.pdf [file tjp0590-0351-SD1.pdf]
